# Supplementary material for: Biodegradable, Flexible and Ultraviolet Blocking Nanocellulose Composite Film Incorporated with Lignin Nanoparticles
Source: MDPI journal article supplement (doi:10.3390/ijms232314863), 2022-11-28
Supplement: s1 [file s1]

**Table S1** List of *p*-toluenesulfonic acid and maleic acid hydrolysis experiment conditions of woody poplar sawdust.

| LNP sample label | Acid concentration<br>(wt%) | Temperature<br>(°C) | Hydrolysis<br>(min) |
|------------------|-----------------------------|---------------------|---------------------|
| P1               | 40                          | 80                  | 60                  |
| P2               | 60                          | 80                  | 120                 |
| P3               | 80                          | 80                  | 20                  |
| M1               | 50                          | 100                 | 60                  |
| M2               | 50                          | 100                 | 120                 |
